# Supplementary material for: Genome Wide Association Study Identifies the HMGCS2 Locus to be Associated With Chlorthalidone Induced Glucose Increase in Hypertensive Patients
Source: PubMed Central journal article supplement — J Am Heart Assoc. 2018 Mar 9;7(6):e007339. doi: 10.1161/JAHA.117.007339 (PMC5907544; doi:10.1161/jaha.117.007339), 2018-03-09
Supplement: JAH3-7-e007339-s001.pdf [file JAH3-7-e007339-s001.pdf]

# **SUPPLEMENTAL MATERIAL**

**Supplementary Figures:****Table S1.** Genome wide significant SNPs from Genome-wide association results for Glucose change among PEAR-2 Blacks.

| SNP         | CHR | BP          | Nearest Gene       | Minor Allele | MAF     | PEAR-2 Chlorthalidone Response |                         |
|-------------|-----|-------------|--------------------|--------------|---------|--------------------------------|-------------------------|
|             |     |             |                    |              |         | $\beta$                        | P-value                 |
| rs201505549 | 9   | 19,743,120  | SLC24A2            | D            | 0.0556  | 15.41                          | 2.11x10 <sup>-09</sup>  |
| rs61824877  | 1   | 200,242,632 | 69kb 3' of C1orf98 | A            | 0.0606  | 12.74                          | 4.82x10 <sup>-09</sup>  |
| rs10919872  | 1   | 200,239,052 | 73kb 3' of C1orf98 | A            | 0.06002 | 12.50                          | 1.13Ex10 <sup>-08</sup> |
| rs2241868   | 1   | 120,293,169 | HMGCS2             | C            | 0.06579 | 12.87                          | 1.37x10 <sup>-08</sup>  |
| rs10923897  | 1   | 120,297,295 | HMGCS2             | G            | 0.06579 | 12.87                          | 1.37x10 <sup>-08</sup>  |
| rs12406668  | 1   | 120,303,055 | HMGCS2             | T            | 0.06579 | 12.87                          | 1.37x10 <sup>-08</sup>  |
| rs61824876  | 1   | 200,238,124 | 74kb 3' of C1orf98 | T            | 0.05978 | 12.39                          | 1.63x10 <sup>-08</sup>  |
| rs10919866  | 1   | 200,230,636 | 81kb 3' of C1orf98 | A            | 0.05922 | 12.12                          | 3.84x10 <sup>-08</sup>  |
| rs9927344   | 16  | 12,388,109  | SNX29              | T            | 0.11819 | 9.61                           | 3.86x10 <sup>-08</sup>  |
| rs9943291   | 1   | 120,292,290 | HMGCS2             | G            | 0.0637  | 12.51                          | 4.17x10 <sup>-08</sup>  |

CHR: chromosome; BP: Base-Pair Position: hg19 position. MAF: Minor Allele

Frequency;  $\beta$ : regression coefficient for allele Minor Allele; D: deletion

**Table S2.** SNPs which met suggestive significance level  $1 \times 10^{-6}$  in the genome wide association with respect to chlorthalidone induced glucose change in PEAR-2 Whites

| SNP         | CHR | BP        | Nearest Gene | A1 | MAF  | Imputation    | Pear-2         |                        |
|-------------|-----|-----------|--------------|----|------|---------------|----------------|------------------------|
|             |     |           |              |    |      | Quality (Rsq) | Chlorthalidone | $\beta$                |
| rs79405723  | 7   | 131336198 | PODXL        | C  | 0.16 | 0.60          | 5.80           | $2.72 \times 10^{-07}$ |
| rs112255998 | 16  | 88263085  | BANP         | G  | 0.06 | 0.72          | 8.28           | $4.17 \times 10^{-07}$ |
| rs72891473  | 6   | 66586528  | MCART3P      | T  | 0.05 | 0.89          | 9.80           | $7.67 \times 10^{-07}$ |
| rs79557329  | 2   | 167709963 | XIRP2        | A  | 0.13 | 0.97          | 5.90           | $8.99 \times 10^{-07}$ |

CHR: chromosome; BP: Base-Pair Position: hg19 position. MAF: Minor Allele Frequency;  $\beta$ : regression coefficient for allele Minor Allele; SE: standard error of the beta coefficient.

**Table S3.** Details of the top associations for Blacks in Whites

| Top Associations for Blacks |     |             |                    |              |                                  |         |                        |                                      |         |         |
|-----------------------------|-----|-------------|--------------------|--------------|----------------------------------|---------|------------------------|--------------------------------------|---------|---------|
| SNP                         | CHR | BP          | Nearest Gene       | Minor Allele | PEAR-2                           |         |                        | PEAR-2                               |         |         |
|                             |     |             |                    |              | Chlorthalidone Response (Blacks) |         |                        | Chlorthalidone Response (Whites)     |         |         |
|                             |     |             |                    |              | MAF                              | $\beta$ | P-value                | MAF                                  | $\beta$ | P-value |
| <b>rs201505549</b>          | 9   | 19,743,120  | SLC24A2            | D            | 0.0556                           | 15.41   | $2.11 \times 10^{-09}$ | SNP removed due to QC (very low MAF) |         |         |
| <b>rs61824877</b>           | 1   | 200,242,632 | 69kb 3' of C1orf98 | A            | 0.0606                           | 12.74   | $4.82 \times 10^{-09}$ | 0.1298                               | -3.60   | 0.006   |
| <b>rs9927344</b>            | 16  | 12,388,109  | SNX29              | T            | 0.11819                          | 9.61    | $3.86 \times 10^{-08}$ | SNP removed due to QC (very low MAF) |         |         |
| <b>rs9943291</b>            | 1   | 120,292,290 | HMGCS2             | G            | 0.0637                           | 12.51   | $4.17 \times 10^{-08}$ | 0.0853                               | 1.39    | 0.34    |

CHR: chromosome; Position: hg19 position. A1: allele 1; A2: allele 2; BP: Base Pair position

**Table S4.** Details of the top associations for Whites in Blacks

| Top Associations for Whites |     |           |              |              |                                  |         |                        |                                      |         |         |
|-----------------------------|-----|-----------|--------------|--------------|----------------------------------|---------|------------------------|--------------------------------------|---------|---------|
| SNP                         | CHR | BP        | Nearest Gene | Minor Allele | PEAR-2                           |         |                        | PEAR-2                               |         |         |
|                             |     |           |              |              | Chlorthalidone Response (Whites) |         |                        | Chlorthalidone Response (Blacks)     |         |         |
|                             |     |           |              |              | MAF                              | $\beta$ | P-value                | MAF                                  | $\beta$ | P-value |
| <b>rs79405723</b>           | 7   | 131336198 | PODXL        | C            | 0.1675                           | 5.80    | $2.72 \times 10^{-07}$ | 0.1645                               | 0.811   | 0.63    |
| <b>rs112255998</b>          | 16  | 88263085  | BANP         | G            | 0.0614                           | 8.28    | $4.17 \times 10^{-07}$ | SNP removed due to QC (very low MAF) |         |         |
| <b>rs72891473</b>           | 6   | 66586528  | MCART3P      | T            | 0.0519                           | 9.80    | $7.67 \times 10^{-07}$ | SNP removed due to QC (very low MAF) |         |         |
| <b>rs79557329</b>           | 2   | 167709963 | XIRP2        | A            | 0.1308                           | 5.90    | $8.99 \times 10^{-07}$ | SNP removed due to QC (very low MAF) |         |         |

CHR: chromosome; Position: hg19 position. A1: allele 1; A2: allele 2; BP: Base Pair position

**Table S5.** Genome Wide Significant signals from the meta-analysis of Chlorthalidone induced glucose change in PEAR-2 and Hydrochlorothiazide induced glucose change in PEAR Blacks

| SNP              | CHR | BP        | A1 | A2 | PEAR-2<br>P-value      | PEAR<br>P-Value       | Meta-<br>analysis<br>P-value | Nearest<br>Gene |
|------------------|-----|-----------|----|----|------------------------|-----------------------|------------------------------|-----------------|
| 11:92331394:A_AT | 11  | 92331394  | I  | R  | $2.22 \times 10^{-4}$  | $1.72 \times 10^{-5}$ | $1.72 \times 10^{-08}$       | FAT3            |
| 1:120292290      | 1   | 120292290 | G  | T  | $4.17 \times 10^{-08}$ | 0.046194              | $3.71 \times 10^{-08}$       | HMGCS2          |

CHR: chromosome; Position: hg19 position. A1: allele 1; A2: allele 2; BP: Base Pair position

**Table S6.** SNPs which met suggestive significance level  $1 \times 10^{-6}$  in the meta-analysis of Chlorthalidone induced glucose change in PEAR-2 and Hydrochlorothiazide induced glucose change in PEAR Whites

| SNP         | CHR | BP        | A1 | A2 | PEAR-2   | PEAR    | Meta-    | Nearest Gene      |
|-------------|-----|-----------|----|----|----------|---------|----------|-------------------|
|             |     |           |    |    | P-value  | P-Value | analysis |                   |
| 12:52807944 | 12  | 52807944  | C  | T  | 6.76E-05 | 0.0004  | 1.39E-07 | 7.8kb 5' of KRT82 |
| 12:52803608 | 12  | 52803608  | A  | G  | 7.27E-05 | 0.0004  | 1.48E-07 | 3.4kb 5' of KRT82 |
| 6:5337596   | 6   | 5337596   | C  | T  | 1.45E-06 | 0.0388  | 2.11E-07 | FARS2             |
| 6:131801262 | 6   | 131801262 | A  | G  | 0.0002   | 0.0007  | 5.81E-07 | 93kb 5' of ARG1   |

CHR: chromosome; Position: hg19 position. A1: allele 1; A2: allele 2; BP: Base Pair position

Figure S1. The overall analyses flowchart of the study depicting the total number of participants that were excluded from the analysis, the final number of participants included in the analysis and the various steps of the analysis framework.

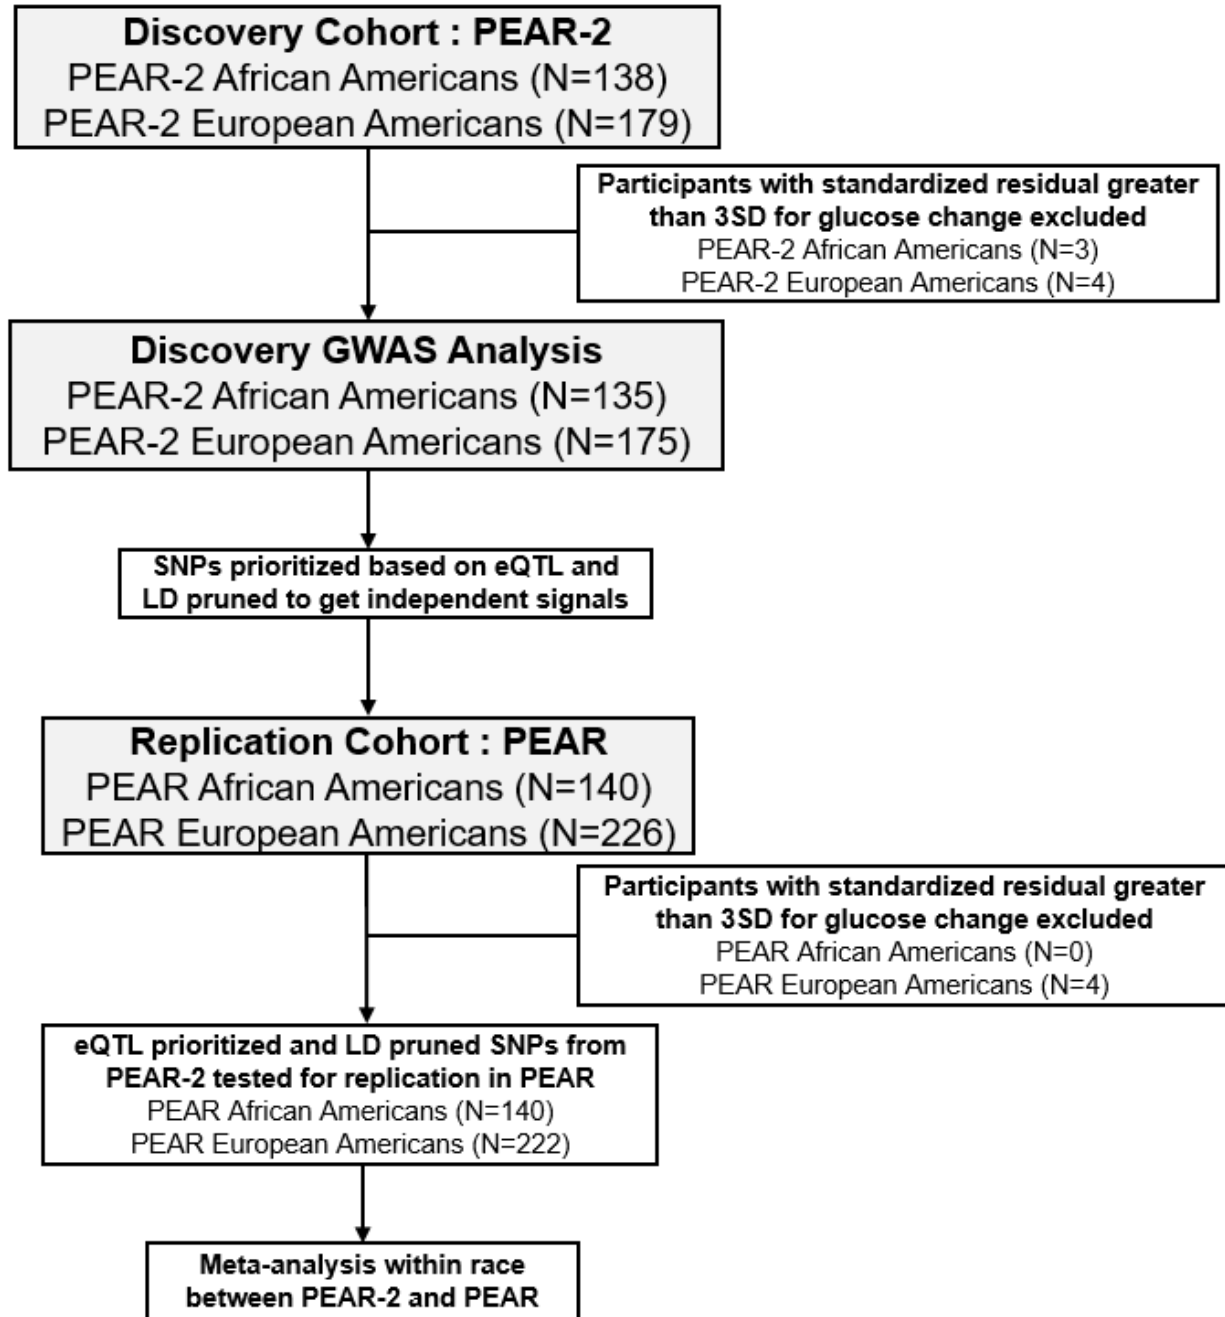



Figure S2. Regional plot for rs9943291 (HMGCS2 gene) the GWAS of glucose change post chlorthalidone treatment.

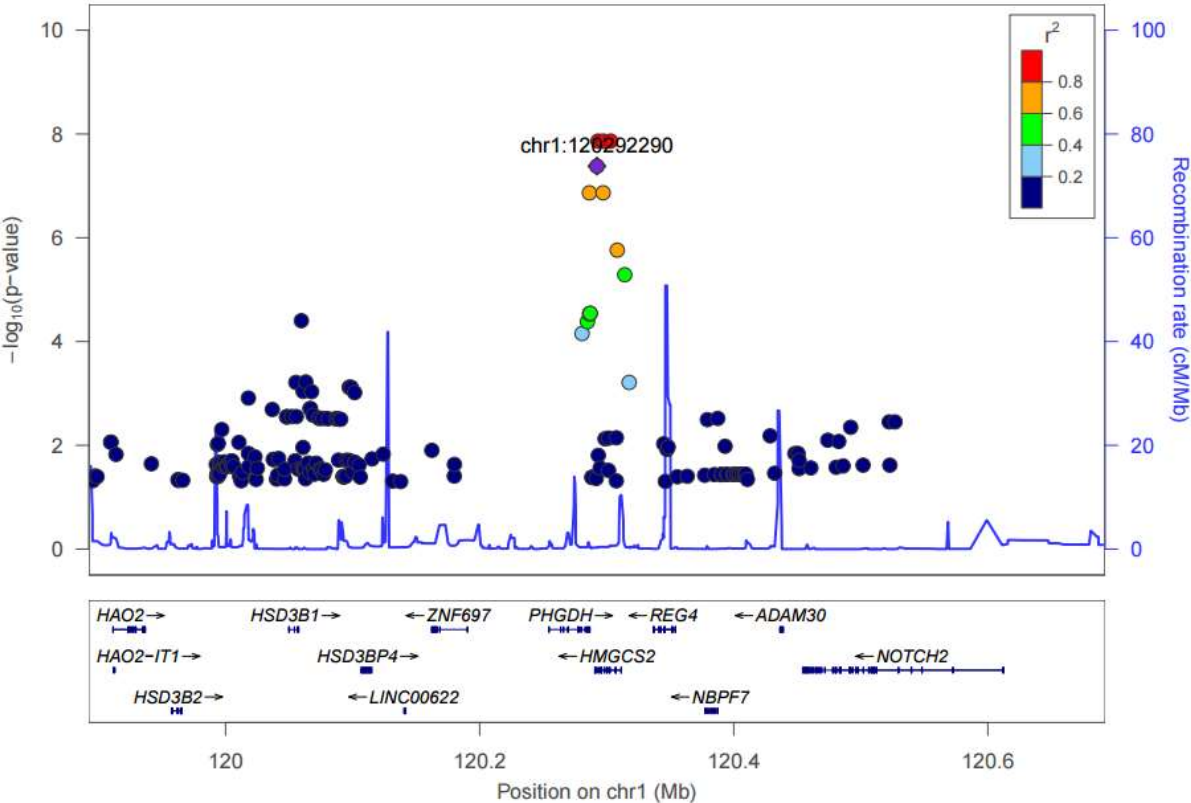

Figure S3. Manhattan plots of Glucose change post chlorthalidone treatment among PEAR-2 European American participants.

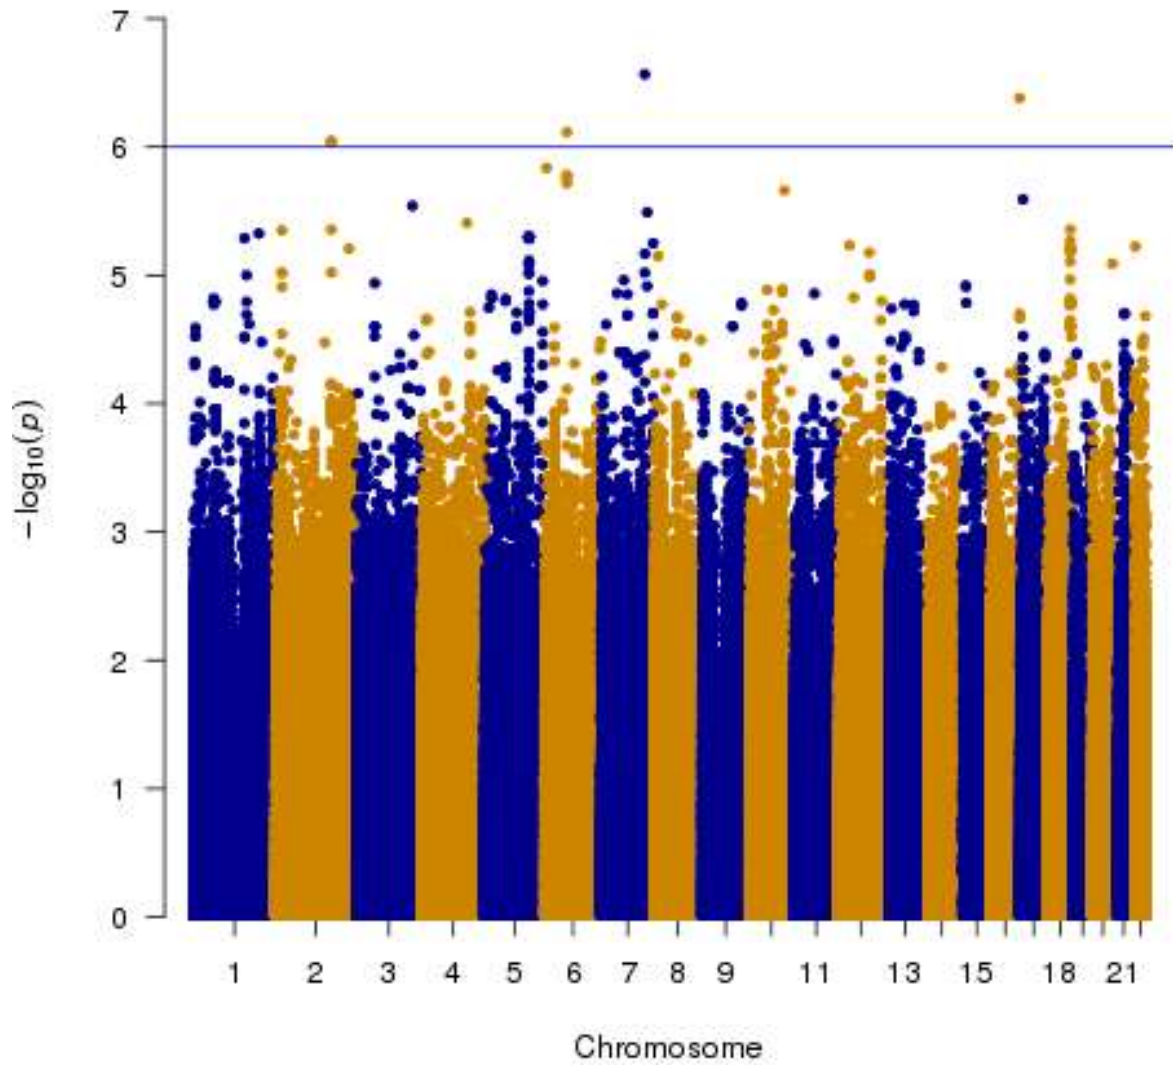

Suggestive significance threshold (Blue line):  $p < 1 \times 10^{-6}$ ; PEAR-2: Pharmacogenomic Evaluation of Antihypertensive Response-2.
